# Supplementary material for: Proteomics Study of Peripheral Blood Mononuclear Cells (PBMCs) in Autistic Children
Source: Front Cell Neurosci. 2019 Mar 19;13:105. doi: 10.3389/fncel.2019.00105 (PMC6433831; doi:10.3389/fncel.2019.00105)
Supplement: TABLE S6 — Differentially expressed proteins associated with signal transduction pathways by using ClueGO analysis. [file Table_6.XLSX]

## Sheet: Table S6
	Table S6. The differentially expressed proteins are associated with signal transduction pathways by using ClueGO analysis.
GOID	GOTerm	Ontology Source	Term PValue	Term PValue Corrected with Bonferroni step down	Group PValue	Group PValue Corrected with Bonferroni step down	GOLevels	GOGroupsa	% Associated Genes	Nr. Genes	Associated Genes Found
GO:0002864	Apoptosis-related network due to altered Notch3 in ovarian cancer	WikiPathways_28.08.2017	0.000620047	0.00248019	0.000620047	0.00124009	[-1]	Group0	5.66038	3	[HSPA5, HSPD1, VIM]
GO:0000558	Complement and Coagulation Cascades	WikiPathways_28.08.2017	0.000807813	0.00242344	0.000807813	0.000807813	[-1]	Group1	5.17241	3	[C3, SERPINA1, SERPIND1]
GO:0001107	Interleukin-12 family signaling	REACTOME_Pathways_28.08.2017	3.47452e-05	0.000555923	3.47452e-05	0.000138981	[-1]	Group2	6.77966	4	[HSPA9, LCP1, LMNB1, P4HB]
GO:0001823	Gene and protein expression by JAK-STAT signaling after Interleukin-12 stimulation	REACTOME_Pathways_28.08.2017	3.47452e-05	0.000555923	3.47452e-05	0.000138981	[-1]	Group2	6.77966	4	[HSPA9, LCP1, LMNB1, P4HB]
GO:0000031	Apoptotic cleavage of cellular proteins	REACTOME_Pathways_28.08.2017	0.000196159	0.00176543	0.0005222	0.0015666	[-1]	Group3	8.33333	3	[LMNB1, PLEC, VIM]
GO:0000149	Apoptosis induced DNA fragmentation	REACTOME_Pathways_28.08.2017	0.0005222	0.002611	0.0005222	0.0015666	[-1]	Group3	6	3	[LMNB1, PLEC, VIM]
GO:0000632	Activation of DNA fragmentation factor	REACTOME_Pathways_28.08.2017	0.0005222	0.002611	0.0005222	0.0015666	[-1]	Group3	6	3	[LMNB1, PLEC, VIM]
GO:0000745	Caspase-mediated cleavage of cytoskeletal proteins	REACTOME_Pathways_28.08.2017	0.000196159	0.00176543	0.0005222	0.0015666	[-1]	Group3	8.33333	3	[LMNB1, PLEC, VIM]
GO:0001670	Apoptotic execution phase	REACTOME_Pathways_28.08.2017	0.0005222	0.002611	0.0005222	0.0015666	[-1]	Group3	6	3	[LMNB1, PLEC, VIM]
GO:0000108	Mitochondrial protein import	REACTOME_Pathways_28.08.2017	1.64016e-06	3.28031e-05	3.38665e-07	2.03199e-06	[-1]	Group4	7.8125	5	[ACO2, ATP5A1, ATP5B, HSPA9, HSPD1]
GO:0000222	Mitochondrial biogenesis	REACTOME_Pathways_28.08.2017	9.3992e-06	0.000159786	3.38665e-07	2.03199e-06	[-1]	Group4	5.49451	5	[ATP5A1, ATP5B, GLUD1, HSPA9, IDH2]
GO:0000259	Mitochondrial transcription initiation	REACTOME_Pathways_28.08.2017	9.3992e-06	0.000159786	3.38665e-07	2.03199e-06	[-1]	Group4	5.49451	5	[ATP5A1, ATP5B, GLUD1, HSPA9, IDH2]
GO:0000669	Transcriptional activation of mitochondrial biogenesis	REACTOME_Pathways_28.08.2017	9.3992e-06	0.000159786	3.38665e-07	2.03199e-06	[-1]	Group4	5.49451	5	[ATP5A1, ATP5B, GLUD1, HSPA9, IDH2]
GO:0001679	Transcription from mitochondrial promoters	REACTOME_Pathways_28.08.2017	9.3992e-06	0.000159786	3.38665e-07	2.03199e-06	[-1]	Group4	5.49451	5	[ATP5A1, ATP5B, GLUD1, HSPA9, IDH2]
GO:0001821	Cristae formation	REACTOME_Pathways_28.08.2017	0.000124855	0.0013734	3.38665e-07	2.03199e-06	[-1]	Group4	9.67742	3	[ATP5A1, ATP5B, HSPA9]
GO:0000020	Citrate cycle (TCA cycle)	KEGG_28.08.2017	2.23508e-06	4.24665e-05	5.33872e-09	3.7371e-08	[-1]	Group5	13.3333	4	[ACO2, DLD, IDH2, MDH2]
GO:0000620	Pyruvate metabolism	KEGG_28.08.2017	0.000249432	0.00174602	5.33872e-09	3.7371e-08	[-1]	Group5	7.69231	3	[DLD, MDH2, ME2]
GO:0000630	Glyoxylate and dicarboxylate metabolism	KEGG_28.08.2017	9.15966e-05	0.00119076	5.33872e-09	3.7371e-08	[-1]	Group5	10.7143	3	[ACO2, DLD, MDH2]
GO:0003925	Amino Acid metabolism	WikiPathways_28.08.2017	9.3992e-06	0.000159786	5.33872e-09	3.7371e-08	[-1]	Group5	5.49451	5	[ACO2, DLD, GLUD1, GOT2, MDH2]
GO:0000534	Glycolysis and Gluconeogenesis	WikiPathways_28.08.2017	0.000491945	0.00295167	5.33872e-09	3.7371e-08	[-1]	Group5	6.12245	3	[DLD, GOT2, MDH2]
GO:0000078	TCA Cycle	WikiPathways_28.08.2017	1.99947e-07	4.59877e-06	5.33872e-09	3.7371e-08	[-1]	Group5	23.5294	4	[ACO2, DLD, IDH2, MDH2]
GO:0000161	The citric acid (TCA) cycle and respiratory electron transport	REACTOME_Pathways_28.08.2017	4.22184e-08	1.01324e-06	5.33872e-09	3.7371e-08	[-1]	Group5	4.79042	8	[ACO2, ATP5A1, ATP5B, DLD, ETFA, IDH2, MDH2, UQCRC2]
GO:0000257	Respiratory electron transport, ATP synthesis by chemiosmotic coupling, and heat production by uncoupling proteins.	REACTOME_Pathways_28.08.2017	4.22184e-08	1.01324e-06	5.33872e-09	3.7371e-08	[-1]	Group5	4.79042	8	[ACO2, ATP5A1, ATP5B, DLD, ETFA, IDH2, MDH2, UQCRC2]
GO:0000603	Regulation of pyruvate dehydrogenase (PDH) complex	REACTOME_Pathways_28.08.2017	0.000109597	0.00131517	5.33872e-09	3.7371e-08	[-1]	Group5	5.06329	4	[ACO2, DLD, IDH2, MDH2]
GO:0001216	Signaling by Retinoic Acid	REACTOME_Pathways_28.08.2017	0.000109597	0.00131517	5.33872e-09	3.7371e-08	[-1]	Group5	5.06329	4	[ACO2, DLD, IDH2, MDH2]
GO:0001435	Respiratory electron transport	REACTOME_Pathways_28.08.2017	4.22184e-08	1.01324e-06	5.33872e-09	3.7371e-08	[-1]	Group5	4.79042	8	[ACO2, ATP5A1, ATP5B, DLD, ETFA, IDH2, MDH2, UQCRC2]
GO:0001471	Complex I biogenesis	REACTOME_Pathways_28.08.2017	4.22184e-08	1.01324e-06	5.33872e-09	3.7371e-08	[-1]	Group5	4.79042	8	[ACO2, ATP5A1, ATP5B, DLD, ETFA, IDH2, MDH2, UQCRC2]
GO:0001578	Pyruvate metabolism	REACTOME_Pathways_28.08.2017	0.000109597	0.00131517	5.33872e-09	3.7371e-08	[-1]	Group5	5.06329	4	[ACO2, DLD, IDH2, MDH2]
GO:0001597	Citric acid cycle (TCA cycle)	REACTOME_Pathways_28.08.2017	3.24146e-07	6.80706e-06	5.33872e-09	3.7371e-08	[-1]	Group5	21.0526	4	[ACO2, DLD, IDH2, MDH2]
GO:0001598	Pyruvate metabolism and Citric Acid (TCA) cycle	REACTOME_Pathways_28.08.2017	0.000109597	0.00131517	5.33872e-09	3.7371e-08	[-1]	Group5	5.06329	4	[ACO2, DLD, IDH2, MDH2]
GO:0004918	Thyroid hormone synthesis	KEGG_28.08.2017	0.00163872	0.00163872	2.70811e-06	1.35406e-05	[-1]	Group6	4.05405	3	[ALB, HSP90B1, HSPA5]
GO:0003613	Photodynamic therapy-induced unfolded protein response	WikiPathways_28.08.2017	8.19624e-05	0.00114747	2.70811e-06	1.35406e-05	[-1]	Group6	11.1111	3	[CALR, HSP90B1, HSPA5]
GO:0000069	Platelet degranulation	REACTOME_Pathways_28.08.2017	4.38228e-05	0.000657343	2.70811e-06	1.35406e-05	[-1]	Group6	4	5	[ALB, APOA1, HSPA5, ITIH4, SERPINA1]
GO:0000143	ABC transporters in lipid homeostasis	REACTOME_Pathways_28.08.2017	0.000150884	0.00150884	2.70811e-06	1.35406e-05	[-1]	Group6	9.09091	3	[ALB, APOA1, P4HB]
GO:0000398	Plasma lipoprotein assembly, remodeling, and clearance	REACTOME_Pathways_28.08.2017	0.00112616	0.00225232	2.70811e-06	1.35406e-05	[-1]	Group6	4.61538	3	[ALB, APOA1, P4HB]
GO:0000776	Scavenging by Class A Receptors	REACTOME_Pathways_28.08.2017	9.15966e-05	0.00119076	2.70811e-06	1.35406e-05	[-1]	Group6	10.7143	3	[APOA1, CALR, HSP90B1]
GO:0000900	ATF6 (ATF6-alpha) activates chaperones	REACTOME_Pathways_28.08.2017	2.17359e-07	4.7819e-06	2.70811e-06	1.35406e-05	[-1]	Group6	11.6279	5	[ALB, APOA1, CALR, HSP90B1, HSPA5]
GO:0000901	XBP1(S) activates chaperone genes	REACTOME_Pathways_28.08.2017	0.000242593	0.00194075	2.70811e-06	1.35406e-05	[-1]	Group6	4.12371	4	[CALR, HSP90B1, HSPA5, HYOU1]
GO:0000903	IRE1alpha activates chaperones	REACTOME_Pathways_28.08.2017	0.000242593	0.00194075	2.70811e-06	1.35406e-05	[-1]	Group6	4.12371	4	[CALR, HSP90B1, HSPA5, HYOU1]
GO:0000904	Unfolded Protein Response (UPR)	REACTOME_Pathways_28.08.2017	0.000242593	0.00194075	2.70811e-06	1.35406e-05	[-1]	Group6	4.12371	4	[CALR, HSP90B1, HSPA5, HYOU1]
GO:0000905	ATF6 (ATF6-alpha) activates chaperone genes	REACTOME_Pathways_28.08.2017	2.44874e-06	4.40773e-05	2.70811e-06	1.35406e-05	[-1]	Group6	33.3333	3	[CALR, HSP90B1, HSPA5]
GO:0001054	GP1b-IX-V activation signalling	REACTOME_Pathways_28.08.2017	9.15966e-05	0.00119076	2.70811e-06	1.35406e-05	[-1]	Group6	10.7143	3	[APOA1, CALR, HSP90B1]
GO:0001776	CREB3 factors activate genes	REACTOME_Pathways_28.08.2017	2.17359e-07	4.7819e-06	2.70811e-06	1.35406e-05	[-1]	Group6	11.6279	5	[ALB, APOA1, CALR, HSP90B1, HSPA5]
GO:0001840	Chylomicron assembly	REACTOME_Pathways_28.08.2017	0.000150884	0.00150884	2.70811e-06	1.35406e-05	[-1]	Group6	9.09091	3	[ALB, APOA1, P4HB]
GO:0001841	Assembly of active LPL and LIPC lipase complexes	REACTOME_Pathways_28.08.2017	2.17359e-07	4.7819e-06	2.70811e-06	1.35406e-05	[-1]	Group6	11.6279	5	[ALB, APOA1, CALR, HSP90B1, HSPA5]
GO:0001844	Plasma lipoprotein remodeling	REACTOME_Pathways_28.08.2017	2.17359e-07	4.7819e-06	2.70811e-06	1.35406e-05	[-1]	Group6	11.6279	5	[ALB, APOA1, CALR, HSP90B1, HSPA5]
GO:0001845	Chylomicron remodeling	REACTOME_Pathways_28.08.2017	0.000150884	0.00150884	2.70811e-06	1.35406e-05	[-1]	Group6	9.09091	3	[ALB, APOA1, P4HB]
GO:0001848	LDL clearance	REACTOME_Pathways_28.08.2017	0.00112616	0.00225232	2.70811e-06	1.35406e-05	[-1]	Group6	4.61538	3	[ALB, APOA1, P4HB]
GO:0001850	Plasma lipoprotein clearance	REACTOME_Pathways_28.08.2017	0.00112616	0.00225232	2.70811e-06	1.35406e-05	[-1]	Group6	4.61538	3	[ALB, APOA1, P4HB]
GO:0001852	HDL remodeling	REACTOME_Pathways_28.08.2017	0.000150884	0.00150884	2.70811e-06	1.35406e-05	[-1]	Group6	9.09091	3	[ALB, APOA1, P4HB]
	a The different GOGropus are indicated with different color corresponding to Figure 4B.
